# Supplementary material for: Interactions of aluminium hydrolytic species with biomolecules
Source: Royal Society of Chemistry journal article supplement (doi:10.1039/b805406c), 2008-01-01
Supplement: b805406c.pdf [file b805406c.pdf]

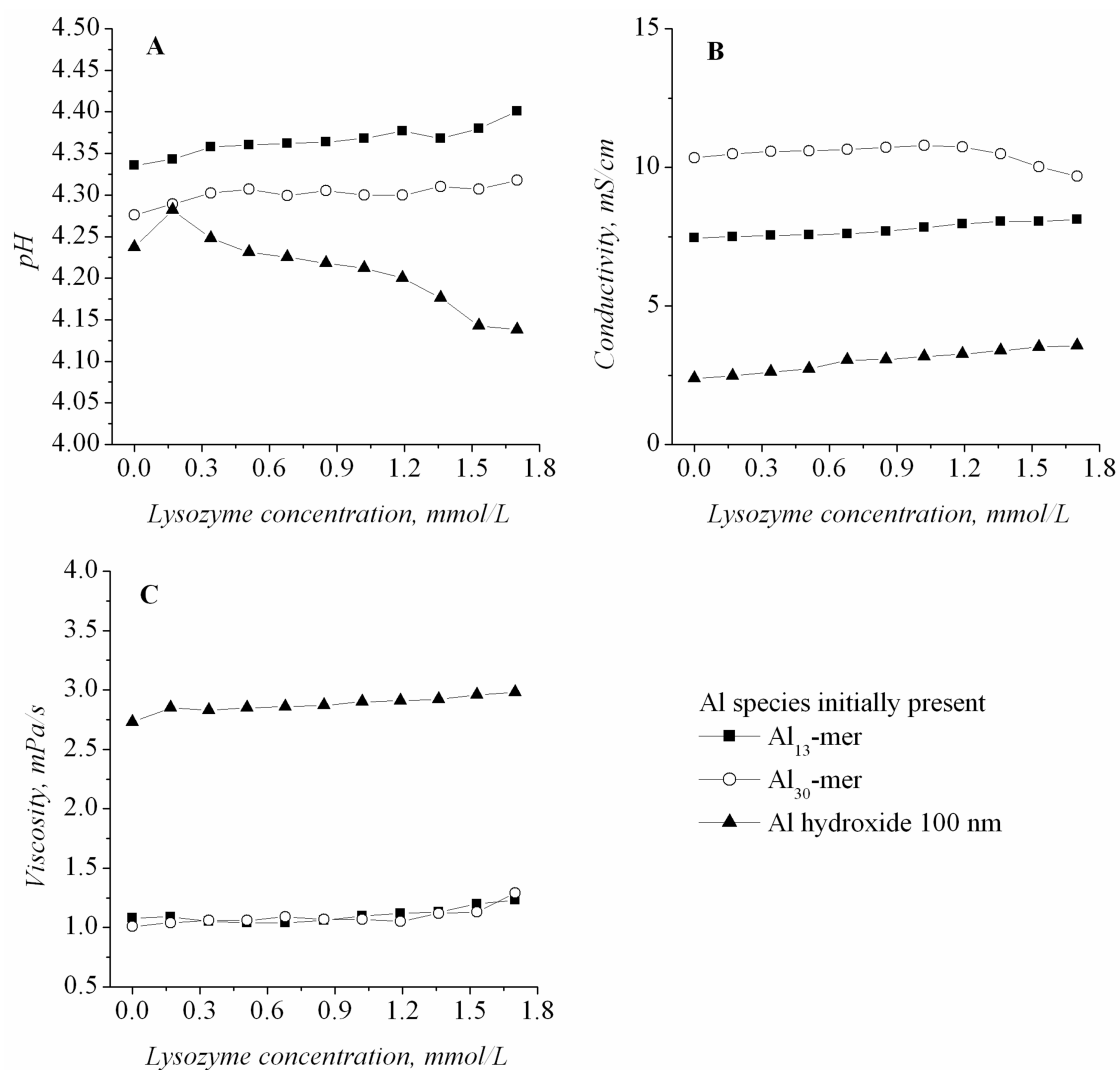

**Fig. S1** (A) pH, (B) conductivity and (C) viscosity of aluminium species-lysozyme samples prepared at various protein concentrations.
